# Supplementary material for: Biological evaluation of optically pure chiral binuclear copper(ii) complexes based on a rosin derivative as highly potential anticancer agents
Source: Royal Society of Chemistry journal article supplement (doi:10.1039/c9dt01942a), 2019-01-01
Supplement: c9dt01942a1.pdf [file c9dt01942a1.pdf]

**Biological evaluation of optically pure chiral binuclear copper(II) complexes  
based on rosin derivative as highly potential anticancer agents**

Bao-Li Fei,<sup>+,a,b,c</sup> Shuangyan Tu,<sup>+,a,b</sup> Zuzhuang Wei,<sup>c</sup> Pingping Wang,<sup>a,b</sup> Jian-Ying Long,<sup>d</sup> Chunhua Qiao<sup>\*e</sup> and Zhen-Feng Chen<sup>\*c</sup>

a Dr. B.-L. Fei, S. S. Tu, P. P. Wang

Jiangsu Key Lab of Biomass-based Green Fuels and Chemicals,  
College of Chemical Engineering,  
Nanjing Forestry University,  
Nanjing, 210037 (China)  
E-mail: hgfbf@njfu.edu.cn

b Dr. B.-L. Fei, S. S. Tu, P. P. Wang

Jiangsu Co-Innovation Center of Efficient Processing and Utilization of Forest  
Resources,  
Nanjing Forestry University,  
Nanjing 210037 (China)

c Z. Z. Wei, Prof. Z.-F. Chen

State Key Laboratory for Chemistry and Molecular Engineering of Medicinal  
Resources, Guangxi Normal University,  
Guilin 541004 (China)  
E-mail: chenzzf@gxnu.edu.cn

d Dr. J.-Y. Long

College of Science,  
Nanjing Forestry University,  
Nanjing 210037, China

e Prof. C. H. Qiao

College of Pharmaceutical Sciences,  
Soochow University,  
Suzhou 215123 (China)  
E-mail: qiaochunhua@suda.edu.cn

+ These authors contributed equally to this work.

## Table of Contents

### Supporting Figures and Scheme

**Fig. S1** IR spectra of **1**.

**Fig. S2** IR spectra of **2**.

**Fig. S3** CD spectra of **1** in ethanol solution with the concentration of  $1.0 \times 10^{-5}$  M.

**Fig. S4** CD spectra of **2** in ethanol solution with the concentration of  $1.0 \times 10^{-5}$  M.

**Fig. S5** ESI-MS spectrum of **1** in DMF.

**Fig. S6** ESI-MS spectrum of **2** in DMF.

**Fig. S7** Uv-vis spectra of **1** (left) and **2** (right) in DMF as a function of time.

**Fig. S8** Uv-vis spectra of **1** (left) and **2** (right) in 10% DMF/50 mM NaCl/5 mM Tris-HCl buffer.

**Fig. S9** Cyclic voltammograms of blank (top, left), 1 mM **HL** (top, right), 1 mM CuCl<sub>2</sub> (bottom, left) and 1 mM CuBr<sub>2</sub> (bottom, left) in DMF and 0.1 M TBABF<sub>4</sub> in DMF.

**Scheme S1** The chemical structure of dehydroabietylamine.

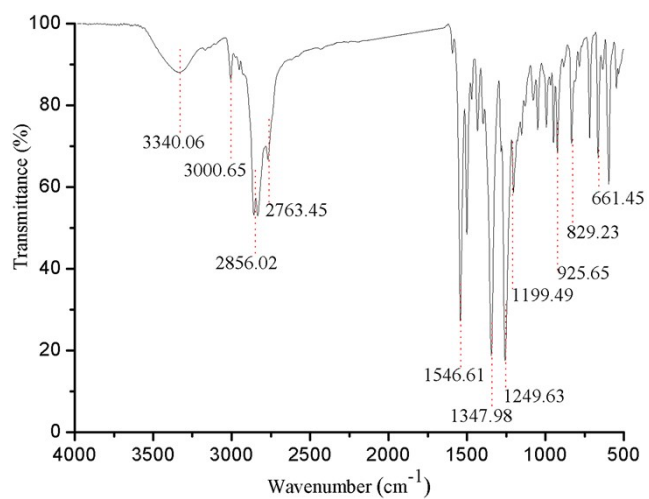

**Fig. S1** IR spectra of **1**.

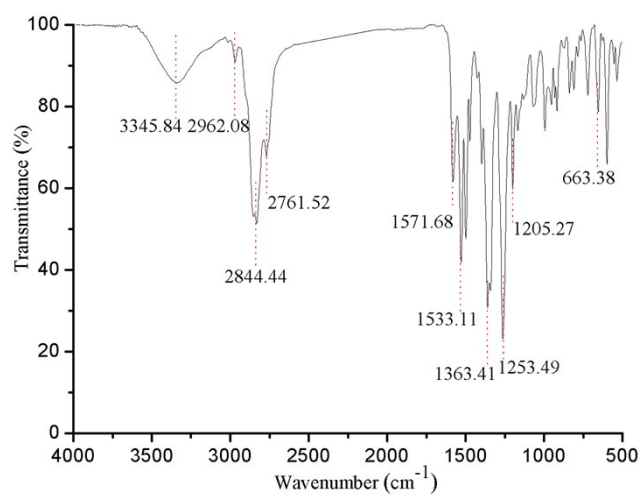

**Fig. S2** IR spectra of **2**.

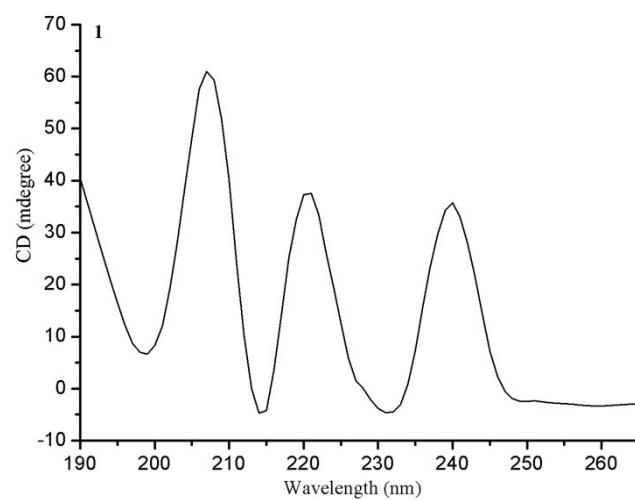

**Fig. S3** CD spectra of **1** in ethanol solution with the concentration of  $1.0 \times 10^{-5}$  M.

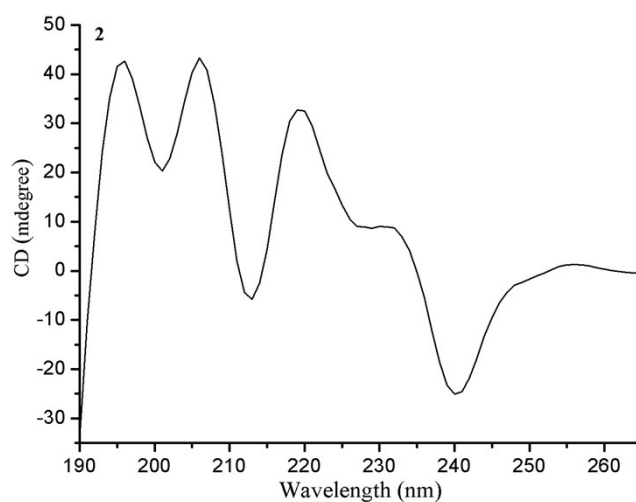

**Fig. S4** CD spectra of **2** in ethanol solution with the concentration of  $1.0 \times 10^{-5}$  M.

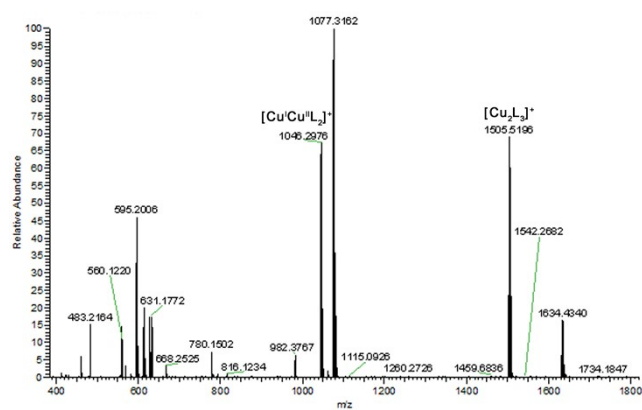

**Fig. S5** ESI-MS spectrum of **1** in DMF.

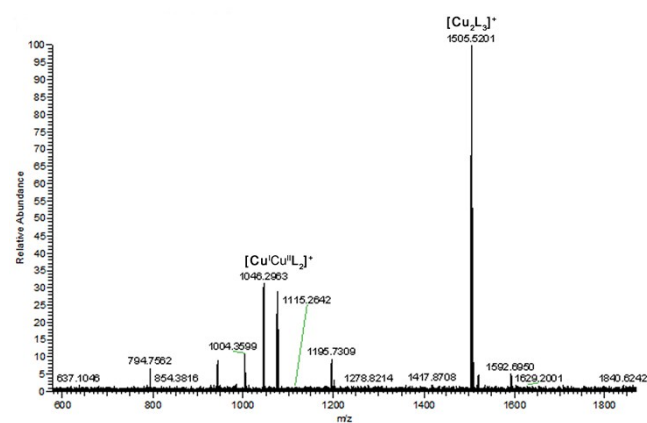

**Fig. S6** ESI-MS spectrum of **2** in DMF.

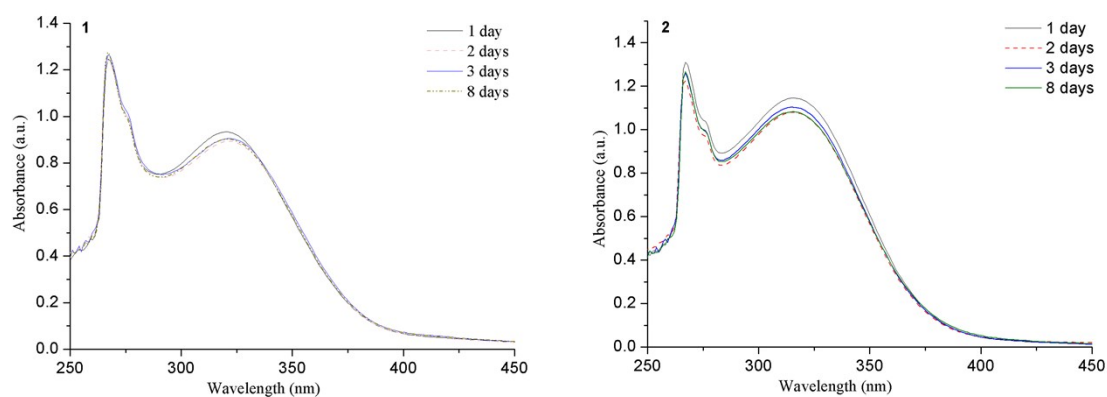

**Fig. S7** Uv-vis spectra of **1** (left) and **2** (right) in DMF as a function of time.

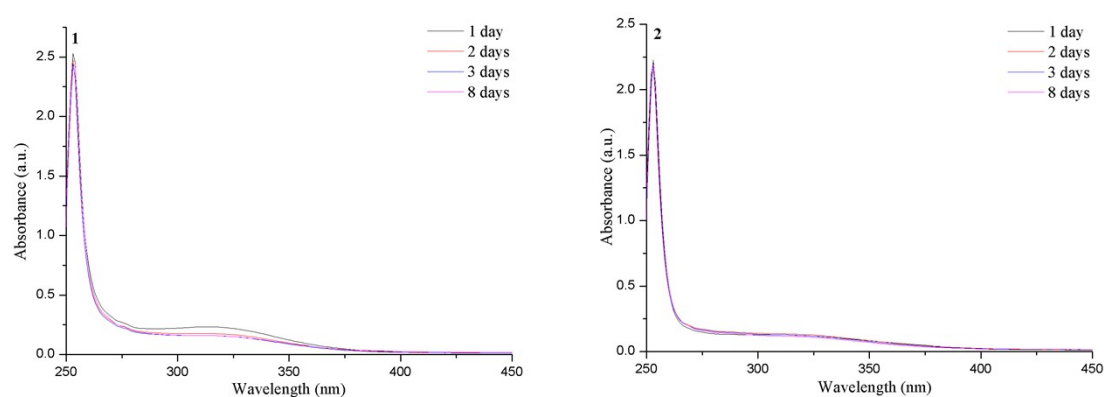

**Fig. S8** Uv-vis spectra of **1** (left) and **2** (right) in 10% DMF/50 mM NaCl/5 mM Tris-HCl buffer.

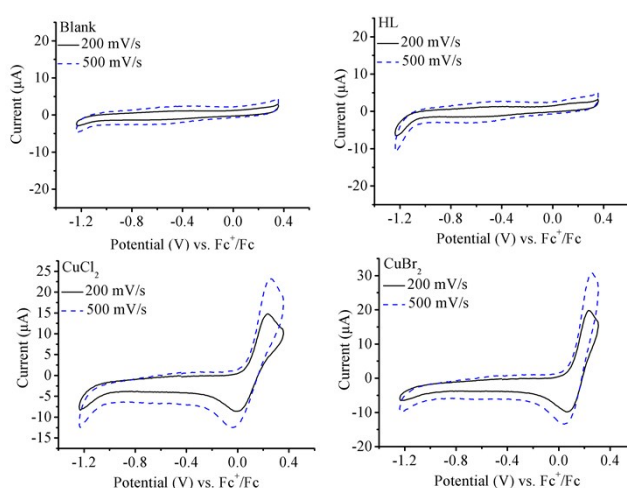

**Fig. S9** Cyclic voltammograms of blank (top, left), 1 mM HL (top, right) , 1 mM  $\text{CuCl}_2$  (bottom, left) and 1 mM  $\text{CuBr}_2$  (bottom, left) in DMF and 0.1 M  $\text{TBABF}_4$  in

DMF.

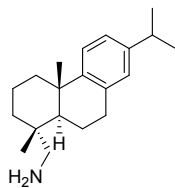

**Scheme S1** The chemical structure of dehydroabietylamine.
